# Supplementary material for: Space-valence mapping of social concepts: Do we arrange negative and positive ethnic stereotypes from left to right?
Source: Frontiers journal article supplement (doi:10.3389/fpsyg.2022.1070177), 2022-12-09
Supplement: Data_Sheet_3.pdf [file Data_Sheet_3.pdf]

## Appendix C

### Descriptive statistics for exploratory analysis of the left-handed subsample

#### Figure C1

*Reaction times in the SJ task aggregated by Name and Response Side (left-handers)*

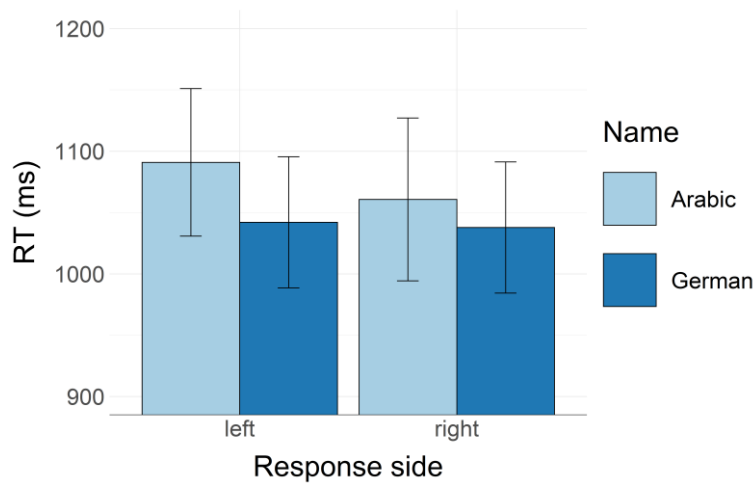

*Note.* Bars represent mean values. Whiskers represent standard errors.

#### Figure C2

*D-primes in the GNAT aggregated by Name and Adjective (left-handers)*

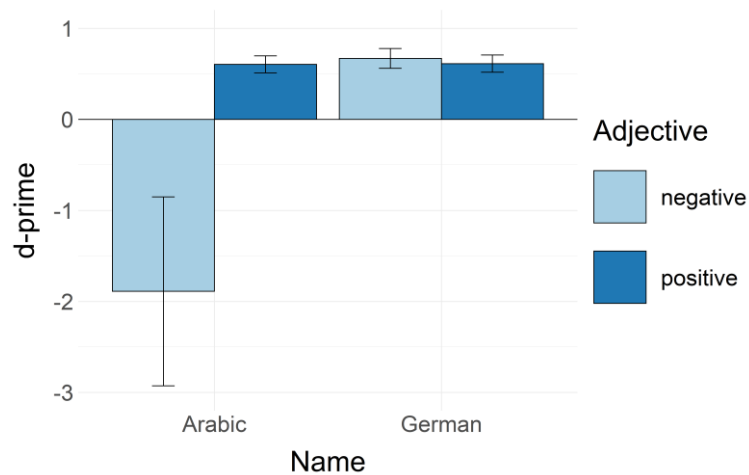

*Note.* Bars represent mean values. Whiskers represent standard errors.

#### Figure C3

*Reaction times in the GNAT aggregated by Name and Adjective (left-handers)*

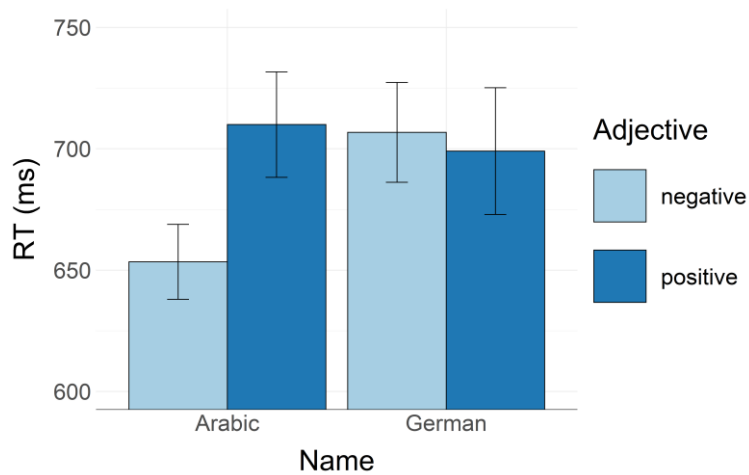

*Note.* Bars represent mean values. Whiskers represent standard errors.

**Figure C4**

*Correlations between congruency variables (left-handers)*

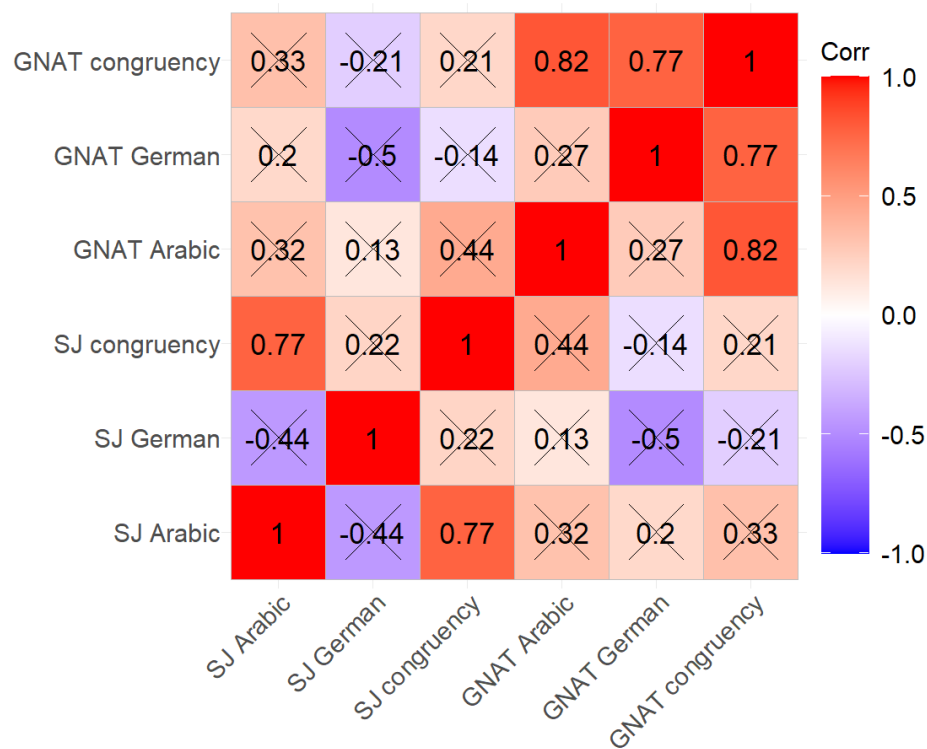

*Note.* Values in each cell represent correlations coefficients. Color coding denotes the direction of the correlation (see legend). Crosses indicate non-significant correlations ( $p > .05$ ).

**Figure C5**

*Paired correlations between SJ and GNAT congruency variables (left-handers)*

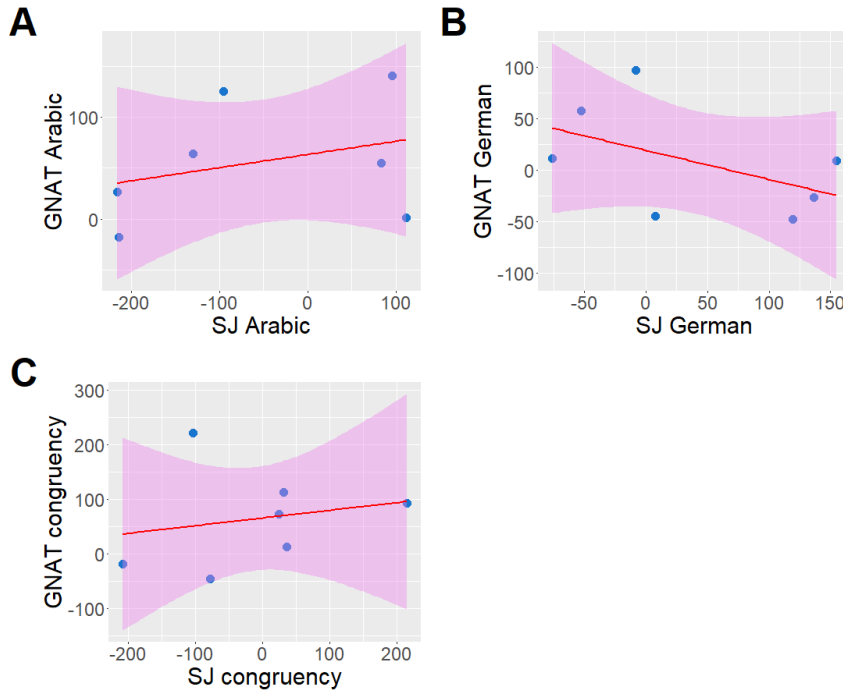

Note. Panel A: correlation between GNAT<sub>Arabic stereotypes</sub> and SJ<sub>Arabic stereotypes</sub>. Panel B: correlation between GNAT<sub>German stereotypes</sub> and SJ<sub>German stereotypes</sub>. Panel C: correlation between GNAT<sub>congruency</sub> and SJ<sub>congruency</sub>. Red lines represent predictions from linear models. Shaded areas represent the 95% confidence intervals. All variabl
